# Supplementary material for: Controlled synthesis of CdE (E = S, Se and Te) nanowires
Source: Royal Society of Chemistry journal article supplement (doi:10.1039/c2ra20060k), 2012-01-01
Supplement: c2ra20060k.pdf [file c2ra20060k.pdf]

## Electronic supplementary information (ESI)

### Controlled Synthesis of CdE (E=S, Se and Te) Nanowires

Lifei Xi <sup>a</sup>, Kheng Hwee Chua <sup>a</sup>, Yanyuan Zhao <sup>c</sup>, Jun Zhang <sup>c</sup>, Qihua Xiong <sup>c,d</sup> and Yeng Ming Lam <sup>a,b\*</sup>

a. School of Materials Science and Engineering, Nanyang Technological University, 50 Nanyang Avenue, Singapore 639798

b. Institut für Werkstoffe der Elektrotechnik II, RWTH Aachen, Sommerfeldstraße 24, D-52074 Aachen, Germany

c. Division of Physics and Applied Physics, School of Physical and Mathematical Sciences, Nanyang Technological University, 21 Nanyang Link, Singapore 637371

d. Division of Microelectronics, School of Electrical and Electronic Engineering, Nanyang Technological University, Singapore 639798.

\* CORRESPONDING AUTHOR, E-mail: [ymlam@ntu.edu.sg](mailto:ymlam@ntu.edu.sg) (Y.M. Lam). Fax: +65 6790 9081.

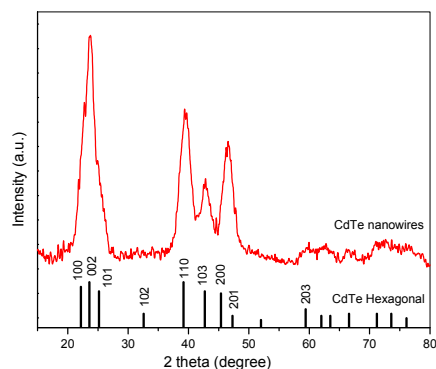

**Fig. S1** Typical X-ray diffraction (XRD) patterns of (a) CdTe nanowires and (b) JCPDS hexagonal CdTe pattern.

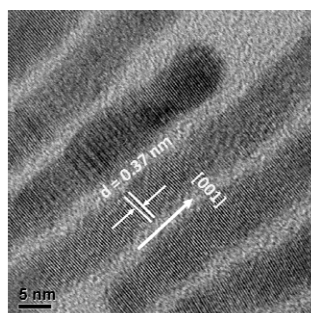

**Fig. S2** High-resolution TEM (HRTEM) image of CdTe nanowires.

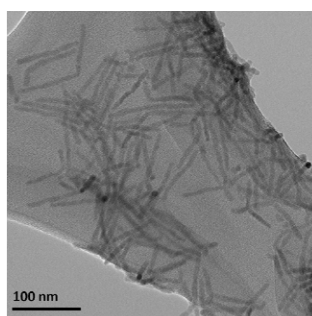

**Fig. S3** CdTe nanocrystals synthesized with DDPA-to-Cd mole ratios: 2.5:1. The ligand used for Te complexes is TOP.

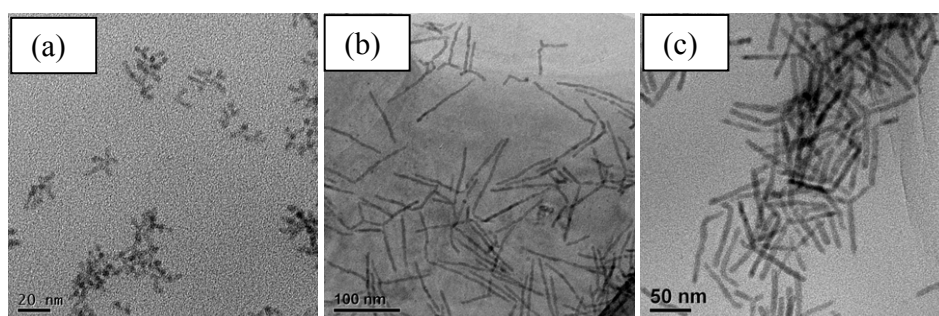

**Fig. S4** TEM images of CdTe nanocrystals synthesized with DDPA at (a) 250 °C, (b) 280 °C and (c) 322 °C.

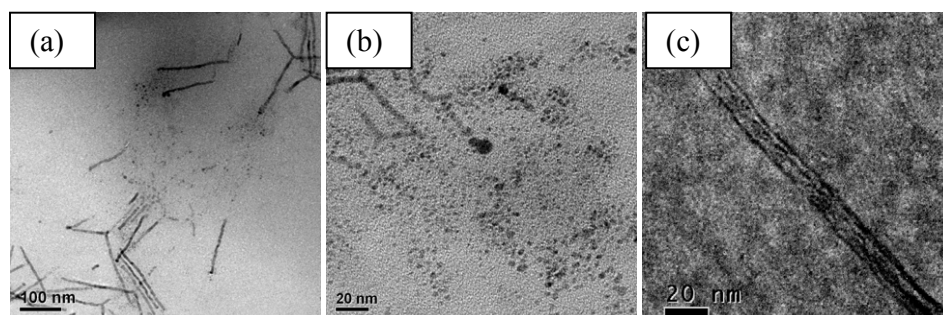

**Fig. S5** Additional TEM images of CdTe (a - b) and (b) CdS nanocrystals show evidence of oriented attachment.

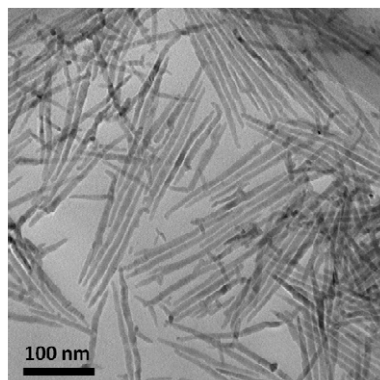

**Fig. S6** TEM image of CdSe with rough surface.
